# Supplementary material
Source: publisher site journal article supplement (https://www.dovepress.com/get_supplementary_file.php?f=329766.docx)
Supplement: Supplementary file 1 [file get_supplementary_file.php]

ORIGINAL RESEARCH – Supplemental Material

Hayes et al

**Supplemental Table 1**. Treatment Pattern by Specific Drug

| **Treatment** (N=114) | **Pre-index**  **n (%)** | **Post-index**  **n (%)** |
| --- | --- | --- |
| **Any DMARD** | **109 (96)** | **102 (89)** |
| **Conventional synthetic DMARDs** | **78 (68)** | **67 (59)** |
| Hydroxychloroquine sulfate | 36 (32) | 32 (28) |
| Leflunomide | 19 (17) | 15 (13) |
| Methotrexate | 50 (44) | 39 (34) |
| Sulfasalazine | 8 (7) | 8 (7) |
| **Nontraditional DMARDs** | **15 (13)** | **10 (9)** |
| Azathioprine | 6 (5) | 6 (5) |
| Cyclophosphamide | 1 (1) | 1 (1) |
| Cyclosporine | 5 (4) | 2 (2) |
| Mycophenolate mofetil/mycophenolate sodium | 4 (4) | 1 (1) |
| **Targeted synthetic DMARDs** | **17 (15)** | **16 (14)** |
| Baricitinib | 2 (2) | 1 (1) |
| Tofacitinib | 15 (13) | 13 (11) |
| Upadacitinib | 0 (0) | 3 (3) |
| **Biologic DMARDs** | **84 (74)** | **68 (60)** |
| Abatacept | 15 (13) | 13 (11) |
| Adalimumab | 15 (13) | 10 (10) |
| Anakinra | 3 (3) | 1 (1) |
| Certolizumab pegol | 11 (10) | 3 (3) |
| Etanercept | 10 (9) | 5 (4) |
| Golimumab | 8 (7) | 14 (12) |
| Infliximab | 11 (10) | 9 (8) |
| Rituximab | 23 (20) | 22 (19) |
| Sarilumab | 8 (7) | 3 (3) |
| Tocilizumab | 20 (18) | 14 (12) |
| **Glucocorticoids** | **105 (92)** | **102 (89)** |
| Betamethasone | 5 (4) | 7 (6) |
| Dexamethasone | 3 (3) | 2 (2) |
| Hydrocortisone | 5 (4) | 4 (4) |
| Methylprednisolone IV injection | 62(54) | 56 (49) |
| Methylprednisolone oral | 18 (16) | 16 (14) |
| Prednisolone | 2 (2) | 1 (1) |
| Prednisone | 84 (74) | 73 (64) |
| Triamcinolone | 16 (14) | 12 (11) |
| **NSAIDs** | **78 (68)** | **64 (56)** |
| Acetaminophen | 47 (41.2) | 34 (30) |
| Aspirin | 5 (4) | 3 (3) |
| Celecoxib | 12 (11) | 11 (10) |
| Diclofenac | 13 (11) | 11 (10) |
| Etodolac | 2 (2) | 2 (2) |
| Ibuprofen | 7 (6) | 5 (4) |
| Ketorolac | 5 (4) | 4 (4) |
| Meloxicam | 12 (11) | 7 (6) |
| Nabumetone | 3 (3) | 1 (1) |
| Naproxen | 4 (4) | 3 (3) |
| Oxaprozin | 2 (2) | 1 (1) |
| Piroxicam | 1 (1) | 1 (1) |
| Salsalate | 3 (3) | 2 (2) |
| Sulindac | 1 (1) | 1 (1) |
| **Opioids** | **67 (59)** | **51 (45)** |
| Buprenorphine | 3 (3) | 2 (2) |
| Codeine | 2 (2) | 2 (2) |
| Fentanyl | 4 (4) | 3 (3) |
| Hydrocodone | 22 (19) | 16 (14) |
| Hydromorphone | 1 (1) | 3 (3) |
| Methadone | 1 (1) | 1 (1) |
| Morphine | 4 (4) | 3 (3) |
| Oxycodone | 26 (23) | 20 (18) |
| Oxymorphone | 0 (0) | 1 (1) |
| Tapentadol | 2 (2) | 2 (2) |
| Tramadol | 21 (18) | 17 (15) |

**Abbreviations:** DMARD, disease-modifying antirheumatic drug; IV, intravenous; NSAID, nonsteroidal anti-inflammatory drug.

**Supplemental Table 2.** ICD Diagnosis Codes for Rheumatoid Arthritis

| **ICD code** | **Description** |
| --- | --- |
| M05.00 | Felty's syndrome, unspecified site |
| M05.011 | Felty's syndrome, right shoulder |
| M05.012 | Felty's syndrome, left shoulder |
| M05.019 | Felty's syndrome, unspecified shoulder |
| M05.021 | Felty's syndrome, right elbow |
| M05.022 | Felty's syndrome, left elbow |
| M05.029 | Felty's syndrome, unspecified elbow |
| M05.031 | Felty's syndrome, right wrist |
| M05.032 | Felty's syndrome, left wrist |
| M05.039 | Felty's syndrome, unspecified wrist |
| M05.041 | Felty's syndrome, right hand |
| M05.042 | Felty's syndrome, left hand |
| M05.049 | Felty's syndrome, unspecified hand |
| M05.051 | Felty's syndrome, right hip |
| M05.052 | Felty's syndrome, left hip |
| M05.059 | Felty's syndrome, unspecified hip |
| M05.061 | Felty's syndrome, right knee |
| M05.062 | Felty's syndrome, left knee |
| M05.069 | Felty's syndrome, unspecified knee |
| M05.071 | Felty's syndrome, right ankle and foot |
| M05.072 | Felty's syndrome, left ankle and foot |
| M05.079 | Felty's syndrome, unspecified ankle and foot |
| M05.09 | Felty's syndrome, multiple sites |
| M05.10 | Rheumatoid lung disease with rheumatoid arthritis of unspecified site |
| M05.111 | Rheumatoid lung disease with rheumatoid arthritis of right shoulder |
| M05.112 | Rheumatoid lung disease with rheumatoid arthritis of left shoulder |
| M05.119 | Rheumatoid lung disease with rheumatoid arthritis of unspecified shoulder |
| M05.121 | Rheumatoid lung disease with rheumatoid arthritis of right elbow |
| M05.122 | Rheumatoid lung disease with rheumatoid arthritis of left elbow |
| M05.129 | Rheumatoid lung disease with rheumatoid arthritis of unspecified elbow |
| M05.131 | Rheumatoid lung disease with rheumatoid arthritis of right wrist |
| M05.132 | Rheumatoid lung disease with rheumatoid arthritis of left wrist |
| M05.139 | Rheumatoid lung disease with rheumatoid arthritis of unspecified wrist |
| M05.141 | Rheumatoid lung disease with rheumatoid arthritis of right hand |
| M05.142 | Rheumatoid lung disease with rheumatoid arthritis of left hand |
| M05.149 | Rheumatoid lung disease with rheumatoid arthritis of unspecified hand |
| M05.151 | Rheumatoid lung disease with rheumatoid arthritis of right hip |
| M05.152 | Rheumatoid lung disease with rheumatoid arthritis of left hip |
| M05.159 | Rheumatoid lung disease with rheumatoid arthritis of unspecified hip |
| M05.161 | Rheumatoid lung disease with rheumatoid arthritis of right knee |
| M05.162 | Rheumatoid lung disease with rheumatoid arthritis of left knee |
| M05.169 | Rheumatoid lung disease with rheumatoid arthritis of unspecified knee |
| M05.171 | Rheumatoid lung disease with rheumatoid arthritis of right ankle and foot |
| M05.172 | Rheumatoid lung disease with rheumatoid arthritis of left ankle and foot |
| M05.179 | Rheumatoid lung disease with rheumatoid arthritis of unspecified ankle and foot |
| M05.19 | Rheumatoid lung disease with rheumatoid arthritis of multiple sites |
| M05.20 | Rheumatoid vasculitis with rheumatoid arthritis of unspecified site |
| M05.211 | Rheumatoid vasculitis with rheumatoid arthritis of right shoulder |
| M05.212 | Rheumatoid vasculitis with rheumatoid arthritis of left shoulder |
| M05.219 | Rheumatoid vasculitis with rheumatoid arthritis of unspecified shoulder |
| M05.221 | Rheumatoid vasculitis with rheumatoid arthritis of right elbow |
| M05.222 | Rheumatoid vasculitis with rheumatoid arthritis of left elbow |
| M05.229 | Rheumatoid vasculitis with rheumatoid arthritis of unspecified elbow |
| M05.231 | Rheumatoid vasculitis with rheumatoid arthritis of right wrist |
| M05.232 | Rheumatoid vasculitis with rheumatoid arthritis of left wrist |
| M05.239 | Rheumatoid vasculitis with rheumatoid arthritis of unspecified wrist |
| M05.241 | Rheumatoid vasculitis with rheumatoid arthritis of right hand |
| M05.242 | Rheumatoid vasculitis with rheumatoid arthritis of left hand |
| M05.249 | Rheumatoid vasculitis with rheumatoid arthritis of unspecified hand |
| M05.251 | Rheumatoid vasculitis with rheumatoid arthritis of right hip |
| M05.252 | Rheumatoid vasculitis with rheumatoid arthritis of left hip |
| M05.259 | Rheumatoid vasculitis with rheumatoid arthritis of unspecified hip |
| M05.261 | Rheumatoid vasculitis with rheumatoid arthritis of right knee |
| M05.262 | Rheumatoid vasculitis with rheumatoid arthritis of left knee |
| M05.269 | Rheumatoid vasculitis with rheumatoid arthritis of unspecified knee |
| M05.271 | Rheumatoid vasculitis with rheumatoid arthritis of right ankle and foot |
| M05.272 | Rheumatoid vasculitis with rheumatoid arthritis of left ankle and foot |
| M05.279 | Rheumatoid vasculitis with rheumatoid arthritis of unspecified ankle and foot |
| M05.29 | Rheumatoid vasculitis with rheumatoid arthritis of multiple sites |
| M05.30 | Rheumatoid heart disease with rheumatoid arthritis of unspecified site |
| M05.311 | Rheumatoid heart disease with rheumatoid arthritis of right shoulder |
| M05.312 | Rheumatoid heart disease with rheumatoid arthritis of left shoulder |
| M05.319 | Rheumatoid heart disease with rheumatoid arthritis of unspecified shoulder |
| M05.321 | Rheumatoid heart disease with rheumatoid arthritis of right elbow |
| M05.322 | Rheumatoid heart disease with rheumatoid arthritis of left elbow |
| M05.329 | Rheumatoid heart disease with rheumatoid arthritis of unspecified elbow |
| M05.331 | Rheumatoid heart disease with rheumatoid arthritis of right wrist |
| M05.332 | Rheumatoid heart disease with rheumatoid arthritis of left wrist |
| M05.339 | Rheumatoid heart disease with rheumatoid arthritis of unspecified wrist |
| M05.341 | Rheumatoid heart disease with rheumatoid arthritis of right hand |
| M05.342 | Rheumatoid heart disease with rheumatoid arthritis of left hand |
| M05.349 | Rheumatoid heart disease with rheumatoid arthritis of unspecified hand |
| M05.351 | Rheumatoid heart disease with rheumatoid arthritis of right hip |
| M05.352 | Rheumatoid heart disease with rheumatoid arthritis of left hip |
| M05.359 | Rheumatoid heart disease with rheumatoid arthritis of unspecified hip |
| M05.361 | Rheumatoid heart disease with rheumatoid arthritis of right knee |
| M05.362 | Rheumatoid heart disease with rheumatoid arthritis of left knee |
| M05.369 | Rheumatoid heart disease with rheumatoid arthritis of unspecified knee |
| M05.371 | Rheumatoid heart disease with rheumatoid arthritis of right ankle and foot |
| M05.372 | Rheumatoid heart disease with rheumatoid arthritis of left ankle and foot |
| M05.379 | Rheumatoid heart disease with rheumatoid arthritis of unspecified ankle and foot |
| M05.39 | Rheumatoid heart disease with rheumatoid arthritis of multiple sites |
| M05.40 | Rheumatoid myopathy with rheumatoid arthritis of unspecified site |
| M05.411 | Rheumatoid myopathy with rheumatoid arthritis of right shoulder |
| M05.412 | Rheumatoid myopathy with rheumatoid arthritis of left shoulder |
| M05.419 | Rheumatoid myopathy with rheumatoid arthritis of unspecified shoulder |
| M05.421 | Rheumatoid myopathy with rheumatoid arthritis of right elbow |
| M05.422 | Rheumatoid myopathy with rheumatoid arthritis of left elbow |
| M05.429 | Rheumatoid myopathy with rheumatoid arthritis of unspecified elbow |
| M05.431 | Rheumatoid myopathy with rheumatoid arthritis of right wrist |
| M05.432 | Rheumatoid myopathy with rheumatoid arthritis of left wrist |
| M05.439 | Rheumatoid myopathy with rheumatoid arthritis of unspecified wrist |
| M05.441 | Rheumatoid myopathy with rheumatoid arthritis of right hand |
| M05.442 | Rheumatoid myopathy with rheumatoid arthritis of left hand |
| M05.449 | Rheumatoid myopathy with rheumatoid arthritis of unspecified hand |
| M05.451 | Rheumatoid myopathy with rheumatoid arthritis of right hip |
| M05.452 | Rheumatoid myopathy with rheumatoid arthritis of left hip |
| M05.459 | Rheumatoid myopathy with rheumatoid arthritis of unspecified hip |
| M05.461 | Rheumatoid myopathy with rheumatoid arthritis of right knee |
| M05.462 | Rheumatoid myopathy with rheumatoid arthritis of left knee |
| M05.469 | Rheumatoid myopathy with rheumatoid arthritis of unspecified knee |
| M05.471 | Rheumatoid myopathy with rheumatoid arthritis of right ankle and foot |
| M05.472 | Rheumatoid myopathy with rheumatoid arthritis of left ankle and foot |
| M05.479 | Rheumatoid myopathy with rheumatoid arthritis of unspecified ankle and foot |
| M05.49 | Rheumatoid myopathy with rheumatoid arthritis of multiple sites |
| M05.50 | Rheumatoid polyneuropathy with rheumatoid arthritis of unspecified site |
| M05.511 | Rheumatoid polyneuropathy with rheumatoid arthritis of right shoulder |
| M05.512 | Rheumatoid polyneuropathy with rheumatoid arthritis of left shoulder |
| M05.519 | Rheumatoid polyneuropathy with rheumatoid arthritis of unspecified shoulder |
| M05.521 | Rheumatoid polyneuropathy with rheumatoid arthritis of right elbow |
| M05.522 | Rheumatoid polyneuropathy with rheumatoid arthritis of left elbow |
| M05.529 | Rheumatoid polyneuropathy with rheumatoid arthritis of unspecified elbow |
| M05.531 | Rheumatoid polyneuropathy with rheumatoid arthritis of right wrist |
| M05.532 | Rheumatoid polyneuropathy with rheumatoid arthritis of left wrist |
| M05.539 | Rheumatoid polyneuropathy with rheumatoid arthritis of unspecified wrist |
| M05.541 | Rheumatoid polyneuropathy with rheumatoid arthritis of right hand |
| M05.542 | Rheumatoid polyneuropathy with rheumatoid arthritis of left hand |
| M05.549 | Rheumatoid polyneuropathy with rheumatoid arthritis of unspecified hand |
| M05.551 | Rheumatoid polyneuropathy with rheumatoid arthritis of right hip |
| M05.552 | Rheumatoid polyneuropathy with rheumatoid arthritis of left hip |
| M05.559 | Rheumatoid polyneuropathy with rheumatoid arthritis of unspecified hip |
| M05.561 | Rheumatoid polyneuropathy with rheumatoid arthritis of right knee |
| M05.562 | Rheumatoid polyneuropathy with rheumatoid arthritis of left knee |
| M05.569 | Rheumatoid polyneuropathy with rheumatoid arthritis of unspecified knee |
| M05.571 | Rheumatoid polyneuropathy with rheumatoid arthritis of right ankle and foot |
| M05.572 | Rheumatoid polyneuropathy with rheumatoid arthritis of left ankle and foot |
| M05.579 | Rheumatoid polyneuropathy with rheumatoid arthritis of unspecified ankle and foot |
| M05.59 | Rheumatoid polyneuropathy with rheumatoid arthritis of multiple sites |
| M05.60 | Rheumatoid arthritis of unspecified site with involvement of other organs and systems |
| M05.611 | Rheumatoid arthritis of right shoulder with involvement of other organs and systems |
| M05.612 | Rheumatoid arthritis of left shoulder with involvement of other organs and systems |
| M05.619 | Rheumatoid arthritis of unspecified shoulder with involvement of other organs and systems |
| M05.621 | Rheumatoid arthritis of right elbow with involvement of other organs and systems |
| M05.622 | Rheumatoid arthritis of left elbow with involvement of other organs and systems |
| M05.629 | Rheumatoid arthritis of unspecified elbow with involvement of other organs and systems |
| M05.631 | Rheumatoid arthritis of right wrist with involvement of other organs and systems |
| M05.632 | Rheumatoid arthritis of left wrist with involvement of other organs and systems |
| M05.639 | Rheumatoid arthritis of unspecified wrist with involvement of other organs and systems |
| M05.641 | Rheumatoid arthritis of right hand with involvement of other organs and systems |
| M05.642 | Rheumatoid arthritis of left hand with involvement of other organs and systems |
| M05.649 | Rheumatoid arthritis of unspecified hand with involvement of other organs and systems |
| M05.651 | Rheumatoid arthritis of right hip with involvement of other organs and systems |
| M05.652 | Rheumatoid arthritis of left hip with involvement of other organs and systems |
| M05.659 | Rheumatoid arthritis of unspecified hip with involvement of other organs and systems |
| M05.661 | Rheumatoid arthritis of right knee with involvement of other organs and systems |
| M05.662 | Rheumatoid arthritis of left knee with involvement of other organs and systems |
| M05.669 | Rheumatoid arthritis of unspecified knee with involvement of other organs and systems |
| M05.671 | Rheumatoid arthritis of right ankle and foot with involvement of other organs and systems |
| M05.672 | Rheumatoid arthritis of left ankle and foot with involvement of other organs and systems |
| M05.679 | Rheumatoid arthritis of unspecified ankle and foot with involvement of other organs and systems |
| M05.69 | Rheumatoid arthritis of multiple sites with involvement of other organs and systems |
| M05.70 | Rheumatoid arthritis with rheumatoid factor of unspecified site without organ or systems involvement |
| M05.711 | Rheumatoid arthritis with rheumatoid factor of right shoulder without organ or systems involvement |
| M05.712 | Rheumatoid arthritis with rheumatoid factor of left shoulder without organ or systems involvement |
| M05.719 | Rheumatoid arthritis with rheumatoid factor of unspecified shoulder without organ or systems involvement |
| M05.721 | Rheumatoid arthritis with rheumatoid factor of right elbow without organ or systems involvement |
| M05.722 | Rheumatoid arthritis with rheumatoid factor of left elbow without organ or systems involvement |
| M05.729 | Rheumatoid arthritis with rheumatoid factor of unspecified elbow without organ or systems involvement |
| M05.731 | Rheumatoid arthritis with rheumatoid factor of right wrist without organ or systems involvement |
| M05.732 | Rheumatoid arthritis with rheumatoid factor of left wrist without organ or systems involvement |
| M05.739 | Rheumatoid arthritis with rheumatoid factor of unspecified wrist without organ or systems involvement |
| M05.741 | Rheumatoid arthritis with rheumatoid factor of right hand without organ or systems involvement |
| M05.742 | Rheumatoid arthritis with rheumatoid factor of left hand without organ or systems involvement |
| M05.749 | Rheumatoid arthritis with rheumatoid factor of unspecified hand without organ or systems involvement |
| M05.751 | Rheumatoid arthritis with rheumatoid factor of right hip without organ or systems involvement |
| M05.752 | Rheumatoid arthritis with rheumatoid factor of left hip without organ or systems involvement |
| M05.759 | Rheumatoid arthritis with rheumatoid factor of unspecified hip without organ or systems involvement |
| M05.761 | Rheumatoid arthritis with rheumatoid factor of right knee without organ or systems involvement |
| M05.762 | Rheumatoid arthritis with rheumatoid factor of left knee without organ or systems involvement |
| M05.769 | Rheumatoid arthritis with rheumatoid factor of unspecified knee without organ or systems involvement |
| M05.771 | Rheumatoid arthritis with rheumatoid factor of right ankle and foot without organ or systems involvement |
| M05.772 | Rheumatoid arthritis with rheumatoid factor of left ankle and foot without organ or systems involvement |
| M05.779 | Rheumatoid arthritis with rheumatoid factor of unspecified ankle and foot without organ or systems involvement |
| M05.79 | Rheumatoid arthritis with rheumatoid factor of multiple sites without organ or systems involvement |
| M05.80 | Other rheumatoid arthritis with rheumatoid factor of unspecified site |
| M05.811 | Other rheumatoid arthritis with rheumatoid factor of right shoulder |
| M05.812 | Other rheumatoid arthritis with rheumatoid factor of left shoulder |
| M05.819 | Other rheumatoid arthritis with rheumatoid factor of unspecified shoulder |
| M05.821 | Other rheumatoid arthritis with rheumatoid factor of right elbow |
| M05.822 | Other rheumatoid arthritis with rheumatoid factor of left elbow |
| M05.829 | Other rheumatoid arthritis with rheumatoid factor of unspecified elbow |
| M05.831 | Other rheumatoid arthritis with rheumatoid factor of right wrist |
| M05.832 | Other rheumatoid arthritis with rheumatoid factor of left wrist |
| M05.839 | Other rheumatoid arthritis with rheumatoid factor of unspecified wrist |
| M05.841 | Other rheumatoid arthritis with rheumatoid factor of right hand |
| M05.842 | Other rheumatoid arthritis with rheumatoid factor of left hand |
| M05.849 | Other rheumatoid arthritis with rheumatoid factor of unspecified hand |
| M05.851 | Other rheumatoid arthritis with rheumatoid factor of right hip |
| M05.852 | Other rheumatoid arthritis with rheumatoid factor of left hip |
| M05.859 | Other rheumatoid arthritis with rheumatoid factor of unspecified hip |
| M05.861 | Other rheumatoid arthritis with rheumatoid factor of right knee |
| M05.862 | Other rheumatoid arthritis with rheumatoid factor of left knee |
| M05.869 | Other rheumatoid arthritis with rheumatoid factor of unspecified knee |
| M05.871 | Other rheumatoid arthritis with rheumatoid factor of right ankle and foot |
| M05.872 | Other rheumatoid arthritis with rheumatoid factor of left ankle and foot |
| M05.879 | Other rheumatoid arthritis with rheumatoid factor of unspecified ankle and foot |
| M05.89 | Other rheumatoid arthritis with rheumatoid factor of multiple sites |
| M05.9 | Rheumatoid arthritis with rheumatoid factor, unspecified |
| M06.00 | Rheumatoid arthritis without rheumatoid factor unspecified site |
| M06.011 | Rheumatoid arthritis without rheumatoid factor, right shoulder |
| M06.012 | Rheumatoid arthritis without rheumatoid factor, left shoulder |
| M06.019 | Rheumatoid arthritis without rheumatoid factor, unspecified shoulder |
| M06.021 | Rheumatoid arthritis without rheumatoid factor, right elbow |
| M06.022 | Rheumatoid arthritis without rheumatoid factor, left elbow |
| M06.029 | Rheumatoid arthritis without rheumatoid factor, unspecified elbow |
| M06.031 | Rheumatoid arthritis without rheumatoid factor, right wrist |
| M06.032 | Rheumatoid arthritis without rheumatoid factor, left wrist |
| M06.039 | Rheumatoid arthritis without rheumatoid factor, unspecified wrist |
| M06.041 | Rheumatoid arthritis without rheumatoid factor, right hand |
| M06.042 | Rheumatoid arthritis without rheumatoid factor, left hand |
| M06.049 | Rheumatoid arthritis without rheumatoid factor, unspecified hand |
| M06.051 | Rheumatoid arthritis without rheumatoid factor, right hip |
| M06.052 | Rheumatoid arthritis without rheumatoid factor, left hip |
| M06.059 | Rheumatoid arthritis without rheumatoid factor, unspecified hip |
| M06.061 | Rheumatoid arthritis without rheumatoid factor, right knee |
| M06.062 | Rheumatoid arthritis without rheumatoid factor, left knee |
| M06.069 | Rheumatoid arthritis without rheumatoid factor, unspecified knee |
| M06.071 | Rheumatoid arthritis without rheumatoid factor, right ankle and foot |
| M06.072 | Rheumatoid arthritis without rheumatoid factor, left ankle and foot |
| M06.079 | Rheumatoid arthritis without rheumatoid factor, unspecified ankle and foot |
| M06.08 | Rheumatoid arthritis without rheumatoid factor vertebrae |
| M06.09 | Rheumatoid arthritis without rheumatoid factor multiple sites |
| M06.20 | Rheumatoid bursitis unspecified site |
| M06.211 | Rheumatoid bursitis, right shoulder |
| M06.212 | Rheumatoid bursitis, left shoulder |
| M06.219 | Rheumatoid bursitis, unspecified shoulder |
| M06.221 | Rheumatoid bursitis, right elbow |
| M06.222 | Rheumatoid bursitis, left elbow |
| M06.229 | Rheumatoid bursitis, unspecified elbow |
| M06.231 | Rheumatoid bursitis, right wrist |
| M06.232 | Rheumatoid bursitis, left wrist |
| M06.239 | Rheumatoid bursitis, unspecified wrist |
| M06.241 | Rheumatoid bursitis, right hand |
| M06.242 | Rheumatoid bursitis, left hand |
| M06.249 | Rheumatoid bursitis, unspecified hand |
| M06.251 | Rheumatoid bursitis, right hip |
| M06.252 | Rheumatoid bursitis, left hip |
| M06.259 | Rheumatoid bursitis, unspecified hip |
| M06.261 | Rheumatoid bursitis, right knee |
| M06.262 | Rheumatoid bursitis, left knee |
| M06.269 | Rheumatoid bursitis, unspecified knee |
| M06.271 | Rheumatoid bursitis, right ankle and foot |
| M06.272 | Rheumatoid bursitis, left ankle and foot |
| M06.279 | Rheumatoid bursitis, unspecified ankle and foot |
| M06.28 | Rheumatoid bursitis vertebrae |
| M06.29 | Rheumatoid bursitis multiple sites |
| M06.30 | Rheumatoid nodule unspecified site |
| M06.311 | Rheumatoid nodule, right shoulder |
| M06.312 | Rheumatoid nodule, left shoulder |
| M06.319 | Rheumatoid nodule, unspecified shoulder |
| M06.321 | Rheumatoid nodule, right elbow |
| M06.322 | Rheumatoid nodule, left elbow |
| M06.329 | Rheumatoid nodule, unspecified elbow |
| M06.331 | Rheumatoid nodule, right wrist |
| M06.332 | Rheumatoid nodule, left wrist |
| M06.339 | Rheumatoid nodule, unspecified wrist |
| M06.341 | Rheumatoid nodule, right hand |
| M06.342 | Rheumatoid nodule, left hand |
| M06.349 | Rheumatoid nodule, unspecified hand |
| M06.351 | Rheumatoid nodule, right hip |
| M06.352 | Rheumatoid nodule, left hip |
| M06.359 | Rheumatoid nodule, unspecified hip |
| M06.361 | Rheumatoid nodule, right knee |
| M06.362 | Rheumatoid nodule, left knee |
| M06.369 | Rheumatoid nodule, unspecified knee |
| M06.371 | Rheumatoid nodule, right ankle and foot |
| M06.372 | Rheumatoid nodule, left ankle and foot |
| M06.379 | Rheumatoid nodule, unspecified ankle and foot |
| M06.38 | Rheumatoid nodule vertebrae |
| M06.39 | Rheumatoid nodule multiple sites |
| M06.80 | Other specified rheumatoid arthritis unspecified site |
| M06.811 | Other specified rheumatoid arthritis, right shoulder |
| M06.812 | Other specified rheumatoid arthritis, left shoulder |
| M06.819 | Other specified rheumatoid arthritis, unspecified shoulder |
| M06.821 | Other specified rheumatoid arthritis, right elbow |
| M06.822 | Other specified rheumatoid arthritis, left elbow |
| M06.829 | Other specified rheumatoid arthritis, unspecified elbow |
| M06.831 | Other specified rheumatoid arthritis, right wrist |
| M06.832 | Other specified rheumatoid arthritis, left wrist |
| M06.839 | Other specified rheumatoid arthritis, unspecified wrist |
| M06.841 | Other specified rheumatoid arthritis, right hand |
| M06.842 | Other specified rheumatoid arthritis, left hand |
| M06.849 | Other specified rheumatoid arthritis, unspecified hand |
| M06.851 | Other specified rheumatoid arthritis, right hip |
| M06.852 | Other specified rheumatoid arthritis, left hip |
| M06.859 | Other specified rheumatoid arthritis, unspecified hip |
| M06.861 | Other specified rheumatoid arthritis, right knee |
| M06.862 | Other specified rheumatoid arthritis, left knee |
| M06.869 | Other specified rheumatoid arthritis, unspecified knee |
| M06.871 | Other specified rheumatoid arthritis, right ankle and foot |
| M06.872 | Other specified rheumatoid arthritis, left ankle and foot |
| M06.879 | Other specified rheumatoid arthritis, unspecified ankle and foot |
| M06.88 | Other specified rheumatoid arthritis vertebrae |
| M06.89 | Other specified rheumatoid arthritis multiple sites |
| M06.9 | Rheumatoid arthritis, unspecified |
| 714.0 | Rheumatoid arthritis |
| 714.1 | Felty's syndrome |
| 714.2 | Other rheumatoid arthritis with visceral or systemic involvement |
| 714.30 | Polyarticular juvenile rheumatoid arthritis, chronic or unspecified |
| 714.31 | Polyarticular juvenile rheumatoid arthritis, acute |
| 714.32 | Pauciarticular juvenile rheumatoid arthritis |
| 714.33 | Monoarticular juvenile rheumatoid arthritis |
| 714.81 | Rheumatoid lung |

Abbreviation: ICD, International Classification of Diseases.

**Supplemental Table 3.** ICD Codes Used for Comorbidity Diagnosis

| **Disease** | **Code type** | **Codes** |
| --- | --- | --- |
| Anemia | ICD-9-CM | 280-285 |
| ICD-10-CM | D50-D53, D55-D64 |
| Arrhythmia | ICD-9-CM | 42610, 42612, 42613, 4267, 4269, 4270, 4271, 4272, 4273, 4274, 4276, 4277, 4278, 4279, 7850, 99601, 99604, V450, V533, 4260 |
| ICD-10-CM | I441, I442, I443, I456, I459, I47, I48, I49, R000, R001, R008, T821, Z450, Z950 |
| Cancer | ICD-9-CM | I40-I65, I70-I76, I79-I239 |
| ICD-10-CM | C00-C96, D00-D49 |
| Cancer - breast | ICD-9-CM | 174, 175 |
| ICD-10-CM | C50 |
| Cancer - colon | ICD-9-CM | 153 |
| ICD-10-CM | C18 |
| Cancer - lung | ICD-9-CM | 162 |
| ICD-10-CM | C33, C34 |
| Cancer - malignancy | ICD-9-CM | 140-165, 170-176, 179-209 |
| ICD-10-CM | C00-C96 |
| Cancer - non-malignant | ICD-9-CM | 210-239 |
| ICD-10-CM | D00-D49 |
| Cancer - skin | ICD-9-CM | 172, 173 |
| ICD-10-CM | C43, C44 |
| Carpal tunnel syndrome | ICD-9-CM | 3540 |
| ICD-10-CM | G560 |
| Cerebrovascular disease/stroke | ICD-9-CM | 430, 431, 432, 433, 434, 435, 437.0, 437.1, 437.2, 437.5, 437.6, 437.7, 437.8 |
| ICD-10-CM | G45, G46, I60, I61, I62, I63, I65, I66, I67.0, I67.1, I67.2, I67.3, I67.5, I67.6, I67.82, I67.89, I68.1, I68.2, I69.0, I69.1, I69.2, I69.3 |
| Chronic pulmonary disease | ICD-9-CM | 490, 491, 492, 493, 494, 495, 496, 500, 501, 502, 503, 504, 505, 5064, 5081, 5088 |
| ICD-10-CM | J40, J41, J42, J43, J44, J45, J46, J47, J60, J61, J62, J63, J64, J65, J66, J67, J684, J701, J703 |
| Ischemic heart disease | ICD-9-CM | 410, 411, 412, 413, 414 |
| ICD-10-CM | I20, I21, I22, I23, I24, I25 |
| Deep vein thrombosis | ICD-9-CM | 452, 453.2, 453.40, 453.41, 453.42, 453.81, 453.82, 453.83, 453.84, 453.85, 453.86, 453.87, 453.88, 453.89 |
| ICD-10-CM | I81, I82.210, I82.220, I82.290, I82.401, I82.402, I82.403, I82.409, I82.411, I82.412, I82.413, I82.419, I82.421, I82.422, I82.423, I82.429, I82.431, I82.432, I82.433, I82.439, I82.441, I82.442, I82.443, I82.449, I82.451, I82.452, I82.453, I82.459, I82.461, I82.462, I82.463, I82.469, I82.491, I82.492, I82.493, I82.499, I82.4Y1, I82.4Y2, I82.4Y3, I82.4Y9, I82.4Z1, I82.4Z2, I82.4Z3, I82.4Z9, I82.601, I82.602, I82.603, I82.611, I82.612, I82.613, I82.619, I82.621, I82.623, I82.629, I82.890, I82.90, I82.A11, I82.A12, I82.A13, I82.A19, I82.B11, I82.B12, I82.B13, I82.B19, I82.C11, I82.C12, I82.C13, I82.C19 |
| Pulmonary embolism | ICD-9-CM | 415.0, 415.13, 415.19 |
| ICD-10-CM | I26.02, I82, I26.04, I26.05, I26.06, I26.07, I82, I26.09, I26.92, I26.93, I26.94, I26.95, I26.96, I26.97, I26.98, I26.99 |
| Depression | ICD-9-CM | 2962, 2963, 2965, 2966, 29689, 2980, 3004, 3091, 311 |
| ICD-10-CM | F3340, F3130, F3131, F3132, F314, F315, F3160, F3161, F3162, F3163, F3164, F3175, F3176, F3177, F3178, F3181, F320, F321, F322, F323, F324, F325, F329, F330, F331, F332, F333, F3341, F3342, F338, F339, F341, F4321, F4323 |
| Diabetes mellitus | ICD-9-CM | 2490, 2491, 2492, 2493, 2499 |
| ICD-10-CM | E08, E09, E10, E11, E13 |
| Gout | ICD-9-CM | 274 |
| ICD-10-CM | M10 |
| Hypercholesterolemia, hyperlipidemia, triglyceridemia (updated grouping) | ICD-9-CM | 272.0, 272.1, 272.2, 272.3, 272.4 |
| ICD-10-CM | E78.00, E78.01, E78.1, E78.2, E78.3, E78.41, E78.49, E78.5 |
| Hypertension | ICD-9-CM | 36211, 4010, 4011, 4019, 40200, 40201, 40210, 40211, 40290, 40291, 40300, 40301, 40310, 40311, 40390, 40391, 40400, 40401, 40402, 40403, 40410, 40411, 40412, 40413, 40490, 40491, 40492, 40493, 40501, 40509, 40511, 40519, 40591, 40599, 4372 |
| ICD-10-CM | H35031, H35032, H35033, H35039, I10, I110, I119, I120, I129, I130, I1310, I1311, I132, I150, I151, I152, I158, I159, I674, N262 |
| Interstitial lung disease | ICD-9-CM | 5163, 5164, 5165, 5166, 5168 |
| ICD-10-CM | J8409, J841, J848 |
| Osteoarthritis | ICD-9-CM | 715 |
| ICD-10-CM | M15-M19 |
| Osteoporosis | ICD-9-CM | 7330 |
| ICD-10-CM | M810, M916, M818 |
| Sjogren's syndrome | ICD-9-CM | 7102 |
| ICD-10-CM | M352 |

Abbreviations: : ICD, International Classification of Diseases; ICD-9-CM, International Classification of Diseases, Ninth Revision, Clinical Modification; ICD-10-CM, International Classification of Diseases, Tenth Revision, Clinical Modification.

**Supplemental Table 4.** Health Care Resource Utilization Definition by CPT Code

| **Health care resource utilization** | **CPT codes** |
| --- | --- |
| Physician office visit | 99201-99205, 99211-99215, 99241-99245, G0463 |
| Evaluation and management except for physician office visit | 99201–99499 except for codes mentioned for physician office visit |
| Anesthesia | 00100–01999; 99100–99150 |
| Surgery | 10000–69990 |
| Radiology | 70000–79999 |
| Pathology and laboratory | 80000–89398 |
| Physician-administered medicine | 90281–99099; 99151–99199; 99500–99607 |
| Other (CPT II and CPT III codes) | 0001F–0015F; 0500F–0584F; 1000F–1505F; 2000F–2060F; 3006F–3776F; 4000F–4563F; 5005F–5250F; 6005F–6150F; 7010F–7025F; 9001F–9007F; 0016T-0207T |

Abbreviation: CPT, current procedural terminology.

**Supplemental Table 5.** Treatments of Interest

| **Drug group** | **Drug name** | **Drug term** |
| --- | --- | --- |
| RCI | Repository corticotropin injection | Acthar, corticotropin |
| bDMARD | Abatacept | Orencia, abatacept |
| bDMARD | Adalimumab | Humira, adalimumab |
| bDMARD | Anakinra | Kineret, anakinra |
| bDMARD | Certolizumab pegol | Cimzia, certolizumab |
| bDMARD | Etanercept | Enbrel, etanercept |
| bDMARD | Golimumab | Simponi, golimumab |
| bDMARD | Infliximab | Avsola, Inflectra, Remicade, Renflexis, infliximab |
| bDMARD | Rituximab | Rituxan, Ruxience, Truxima, rituximab |
| bDMARD | Sarilumab | Kevzara, sarilumab |
| bDMARD | Tocilizumab | Actemra, tocilizumab |
| tsDMARD | Baricitinib | Olumiant, baricitinib |
| tsDMARD | Tofacitinib | Xeljanz, tofacitinib |
| tsDMARD | Upadacitinib | Rinvoq, upadacitinib |
| csDMARD | Chloroquine | chloroquine |
| csDMARD | Hydroxychloroquine Sulfate | Plaquenil, hydroxychloroquine |
| csDMARD | Leflunomide | Arava, leflunomide |
| csDMARD | Methotrexate | Otrexup, Rasuvo, Reditrex, Trexall, Xatmep, methotrexate |
| csDMARD | Sulfasalazine | Azulfidine, sulfasalazine |
| ntDMARD | Azathioprine | Azasan, Imuran, azathioprine |
| ntDMARD | Cyclophosphamide | cyclophosphamide |
| ntDMARD | Cyclosporine | Restasis, Gengraf, Neoral, Sandimmune, cyclosporine |
| ntDMARD | Mycophenolate Mofetil/Mycophenolate Sodium | Cellcept, mycophenolate |
| Glucocorticoid | Betamethasone | betamethasone |
| Glucocorticoid | Budesonide | budesonide |
| Glucocorticoid | Cortisone | cortisone |
| Glucocorticoid | Dexamethasone | dexamethasone |
| Glucocorticoid | Hydrocortisone | hydrocortisone |
| Glucocorticoid | Methylprednisolone IV Injection | methylprednisolone |
| Glucocorticoid | Methylprednisolone Oral | methylprednisolone |
| Glucocorticoid | Paramethasone | paramethasone |
| Glucocorticoid | Prednisolone | prednisolone |
| Glucocorticoid | Prednisone | prednisone |
| Glucocorticoid | Triamcinolone | triamcinolone |
| NSAID | Acetaminophen | Percocet, Tylenol, acetaminophen |
| NSAID | Aspirin | salicylic acid, aspirin |
| NSAID | Celecoxib | celecoxib |
| NSAID | Diclofenac | diclofenac, Arthrotec, Voltaren |
| NSAID | Diflunisal | diflunisal |
| NSAID | Etodolac | etodolac |
| NSAID | Fenoprofen | fenoprofen |
| NSAID | Flurbiprofen | flurbiprofen |
| NSAID | Ibuprofen | ibuprofen, Vicoprofen |
| NSAID | Indomethacin | indomethacin |
| NSAID | Ketoprofen | ketoprofen |
| NSAID | Ketorolac | ketorolac |
| NSAID | Meclofenamate | meclofenamate |
| NSAID | Mefenamic acid | mefenamic |
| NSAID | Meloxicam | meloxicam |
| NSAID | Nabumetone | nabumetone |
| NSAID | Naproxen | naproxen |
| NSAID | Oxaprozin | oxaprozin |
| NSAID | Phenylbutazone | phenylbutazone |
| NSAID | Piroxicam | piroxicam |
| NSAID | Salsalate | salsalate |
| NSAID | Sulindac | sulindac |
| NSAID | Tolmetin | tolmetin |
| Opioid | Alfentanil | alfentanil |
| Opioid | Benzhydrocodone | benzhydrocodone |
| Opioid | Buprenorphine | buprenorphine |
| Opioid | Butorphanol | butorphanol |
| Opioid | Codeine | codeine |
| Opioid | Dihydrocodeine | dihydrocodeine |
| Opioid | Fentanyl | fentanyl |
| Opioid | Hydrocodone | hydrocodone, Vicoprofen |
| Opioid | Hydromorphone | hydromorphone |
| Opioid | Levorphanol | levorphanol |
| Opioid | Meperidine | meperidine |
| Opioid | Methadone | methadone |
| Opioid | Morphine | morphine |
| Opioid | Nalbuphine | nalbuphine |
| Opioid | Oxycodone | Percocet, oxycodone |
| Opioid | Oxymorphone | oxymorphone |
| Opioid | Pentazocine | pentazocine |
| Opioid | Remifentanil | remifentanil |
| Opioid | Sufentanil | sufentanil |
| Opioid | Tapentadol | tapentadol |
| Opioid | Tramadol | tramadol |

Abbreviations: b, biologic; cs, conventional synthetic; DMARD, disease-modifying antirheumatic drug; NSAID, nonsteroidal anti-inflammatory drug; nt, nontraditional; ts, targeted synthetic.
